# Supplementary material
Source: Research Square preprint supplement (doi:10.21203/rs.3.rs-9771771/v1)
Supplement: Supplementary file 1 [file 3cd296df2ff7533e16089cd0.xlsx]

## Sheet: Sheet1
Library	LA25_B1_FOLUST_Lf_0dpi_Log	LA25_B1_FOLUST_Lf_2dpi_Log	LA25_B1_FOLUST_Lf_4dpi_Log	LA25_B1_FOLUST_Rt_0dpi_Log	LA25_B1_FOLUST_Rt_2dpi_Log	LA25_B1_FOLUST_Rt_4dpi_Log	LA25_B1_Fomh16_Lf_0dpi_Log	LA25_B1_Fomh16_Lf_2dpi_Log	LA25_B1_Fomh16_Lf_4dpi_Log	LA25_B1_Fomh16_Rt_0dpi_Log	LA25_B1_Fomh16_Rt_2dpi_Log	LA25_B1_Fomh16_Rt_4dpi_Log	LA25_B1_Mock_Lf_0dpi_Log	LA25_B1_Mock_Lf_2dpi_Log	LA25_B1_Mock_Lf_4dpi_Log	LA25_B1_Mock_Rt_0dpi_Log	LA25_B1_Mock_Rt_2dpi_Log	LA25_B1_Mock_Rt_4dpi_Log	LA25_B2_FOLUST_Lf_0dpi_Log	LA25_B2_FOLUST_Lf_2dpi_Log	LA25_B2_FOLUST_Lf_4dpi_Log	LA25_B2_FOLUST_Rt_0dpi_Log	LA25_B2_FOLUST_Rt_2dpi_Log	LA25_B2_FOLUST_Rt_4dpi_Log	LA25_B2_Fomh16_Lf_0dpi_Log	LA25_B2_Fomh16_Lf_2dpi_Log	LA25_B2_Fomh16_Lf_4dpi_Log	LA25_B2_Fomh16_Rt_0dpi_Log	LA25_B2_Fomh16_Rt_2dpi_Log	LA25_B2_Fomh16_Rt_4dpi_Log	LA25_B2_Mock_Lf_0dpi_Log	LA25_B2_Mock_Lf_2dpi_Log	LA25_B2_Mock_Lf_4dpi_Log	LA25_B2_Mock_Rt_0dpi_Log	LA25_B2_Mock_Rt_2dpi_Log	LA25_B2_Mock_Rt_4dpi_Log	LA25_B3_FOLUST_Lf_0dpi_Log	LA25_B3_FOLUST_Lf_2dpi_Log	LA25_B3_FOLUST_Lf_4dpi_Log	LA25_B3_FOLUST_Rt_0dpi_Log	LA25_B3_FOLUST_Rt_2dpi_Log	LA25_B3_FOLUST_Rt_4dpi_Log	LA25_B3_Fomh16_Lf_0dpi_Log	LA25_B3_Fomh16_Lf_2dpi_Log	LA25_B3_Fomh16_Lf_4dpi_Log	LA25_B3_Fomh16_Rt_0dpi_Log	LA25_B3_Fomh16_Rt_2dpi_Log	LA25_B3_Fomh16_Rt_4dpi_Log	LA25_B3_Mock_Lf_0dpi_Log
Number of input reads	35922428	34285816	32187237	29963068	29503992	13268539	35777176	32530363	27398682	19783807	35467735	30864089	19953042	28273572	32977791	26805909	35420774	34915452	34158680	44062952	25624175	31630802	40027684	22987075	33332787	30309942	31909691	28789328	32411285	28574111	25983096	32577903	22527051	31723352	30415808	30934485	37655170	33928747	49099508	29406830	32729435	26122804	14963060	28394146	24147724	29022115	26065155	27239189	37571814
Average input read length	275	265	268	271	277	264	268	275	271	268	273	269	262	269	271	283	270	269	276	275	277	277	271	272	269	269	268	263	271	268	266	269	272	267	274	273	274	268	274	273	269	270	273	271	265	272	270	263	266
Uniquely mapped reads number	34144695	32254992	30445156	28183321	27816749	11658799	33218298	30742040	26124954	18215187	33230300	28594242	18709375	25896499	31283066	25138512	33308165	31247330	32509063	41952298	24295949	29801626	37414817	20815714	31684335	28849108	30276733	26767197	30117460	25231113	24712791	31034506	21471978	29723534	28622672	28511082	35798192	32064055	46551819	27217627	30528407	23829068	14184035	26773018	22927588	26986668	24357300	24560845	35476724
Uniquely mapped reads	95.05%	94.08%	94.59%	94.06%	94.28%	87.87%	92.85%	94.50%	95.35%	92.07%	93.69%	92.65%	93.77%	91.59%	94.86%	93.78%	94.04%	89.49%	95.17%	95.21%	94.82%	94.22%	93.47%	90.55%	95.05%	95.18%	94.88%	92.98%	92.92%	88.30%	95.11%	95.26%	95.32%	93.70%	94.10%	92.17%	95.07%	94.50%	94.81%	92.56%	93.28%	91.22%	94.79%	94.29%	94.95%	92.99%	93.45%	90.17%	94.42%
Number of splices Total	26681412	22967381	23336319	21587432	23259434	8367998	24366882	24432807	20469536	13381856	28536780	22071117	13782391	18658876	24730309	21104849	28372573	23659043	24911518	35100218	20175593	23302415	33584362	16838506	23685033	22674262	24020231	20057988	25862274	19999513	17980539	25061449	17422256	22281019	25455365	23332692	27598615	24355859	36300725	19697596	25592083	18650148	10566857	21771088	17329450	19733618	19957093	18437329	25697566
Number of splices Annotated sjdb	23518170	20331303	20542903	18813317	20328654	7171474	21531063	21609739	18005607	11681067	24873160	18968780	12180292	16498980	21893293	18350957	24787691	20523682	21740579	30881042	17643217	20441789	29253650	14393781	20686776	19751679	20717202	17395192	22301840	17023831	15698836	22053813	15407896	19448467	22025339	20024086	24429974	21222789	32024550	17155718	22201046	15917025	9279977	19116115	15261751	17045304	17162788	15620764	22719754
Number of splices GT/AG	26326934	22665396	23030590	21305978	22958764	8253276	24052344	24105961	20205581	13216377	28168712	21783524	13591193	18418791	24401885	20828534	28002821	23352852	24577134	34633749	19919291	22997762	33143041	16595796	23366255	22375819	23702861	19792615	25517487	19726887	17735386	24733636	17187735	21998631	25115074	23028426	27232108	24026950	35826035	19436755	25258259	18398634	10424931	21475638	17105777	19475380	19697307	18193927	25355381
Number of splices GC/AG	288313	254772	251667	218763	235188	83354	255894	277585	218624	131300	288155	217611	158867	199864	274186	218968	294346	233341	272325	396224	214779	237858	344667	191850	262832	249985	263722	206647	266763	208125	200043	273877	199070	217590	266018	234864	300417	269687	393935	199612	258726	190918	115365	248354	186224	195729	198826	179388	280305
Number of splices AT/AC	17606	12389	16692	20433	22442	7382	16915	12973	13922	10371	26133	20640	8880	9931	15778	18574	26121	22714	16652	20323	13456	19340	32455	15883	14749	13099	14158	17996	25041	17820	11151	16335	9573	20757	23854	21771	15547	16024	23058	19089	24720	17902	6649	12905	10960	19960	18804	16337	15031
Number of reads mapped to multiple loci	706334	982409	570551	730372	746857	416554	749429	856706	458461	462151	923957	894481	390716	811757	558924	659848	862139	958497	619164	834485	523672	702382	1012758	691959	649730	584639	742135	735775	918154	842721	521898	613415	383881	765762	789671	797112	789057	757026	1009657	765765	817126	739372	306996	538345	456851	803952	750557	871376	754954
of reads mapped to multiple loci	1.97%	2.87%	1.77%	2.44%	2.53%	3.14%	2.09%	2.63%	1.67%	2.34%	2.61%	2.90%	1.96%	2.87%	1.69%	2.46%	2.43%	2.75%	1.81%	1.89%	2.04%	2.22%	2.53%	3.01%	1.95%	1.93%	2.33%	2.56%	2.83%	2.95%	2.01%	1.88%	1.70%	2.41%	2.60%	2.58%	2.10%	2.23%	2.06%	2.60%	2.50%	2.83%	2.05%	1.90%	1.89%	2.77%	2.88%	3.20%	2.01%
Number of reads mapped to too many loci	178805	166798	110015	151981	129215	295498	731288	114936	92422	306139	211010	180560	193668	696696	144119	136077	193761	875291	114084	161108	112137	172377	201385	248917	114682	100992	111542	252144	188763	245506	79459	110151	101810	219431	122157	286568	112654	162505	159772	466551	237295	393744	44765	91531	79569	198135	167185	590475	147872
of reads mapped to too many loci	0.50%	0.49%	0.34%	0.51%	0.44%	2.23%	2.04%	0.35%	0.34%	1.55%	0.59%	0.59%	0.97%	2.46%	0.44%	0.51%	0.55%	2.51%	0.33%	0.37%	0.44%	0.54%	0.50%	1.08%	0.34%	0.33%	0.35%	0.88%	0.58%	0.86%	0.31%	0.34%	0.45%	0.69%	0.40%	0.93%	0.30%	0.48%	0.33%	1.59%	0.73%	1.51%	0.30%	0.32%	0.33%	0.68%	0.64%	2.17%	0.39%
Number of reads unmapped too many mismatches	0	0	0	0	0	0	0	0	0	0	0	0	0	0	0	0	0	0	0	0	0	0	0	0	0	0	0	0	0	0	0	0	0	0	0	0	0	0	0	0	0	0	0	0	0	0	0	0	0
of reads unmapped too many mismatches	0.00%	0.00%	0.00%	0.00%	0.00%	0.00%	0.00%	0.00%	0.00%	0.00%	0.00%	0.00%	0.00%	0.00%	0.00%	0.00%	0.00%	0.00%	0.00%	0.00%	0.00%	0.00%	0.00%	0.00%	0.00%	0.00%	0.00%	0.00%	0.00%	0.00%	0.00%	0.00%	0.00%	0.00%	0.00%	0.00%	0.00%	0.00%	0.00%	0.00%	0.00%	0.00%	0.00%	0.00%	0.00%	0.00%	0.00%	0.00%	0.00%
Number of reads unmapped too short	855126	830177	1014950	857972	774692	869944	965413	774837	680682	747632	1058751	1152592	573043	804270	948317	797267	965962	1771938	828891	1033063	633557	864900	1327246	1167384	843468	761896	764566	922528	1167594	2229298	642198	793911	550582	888051	868805	1322093	893415	886428	1323161	883992	1102174	1108627	406374	955210	616277	993579	756438	1152226	1092263
of reads unmapped too short	2.38%	2.42%	3.15%	2.86%	2.63%	6.56%	2.70%	2.38%	2.48%	3.78%	2.99%	3.73%	2.87%	2.84%	2.88%	2.97%	2.73%	5.07%	2.43%	2.34%	2.47%	2.73%	3.32%	5.08%	2.53%	2.51%	2.40%	3.20%	3.60%	7.80%	2.47%	2.44%	2.44%	2.80%	2.86%	4.27%	2.37%	2.61%	2.69%	3.01%	3.37%	4.24%	2.72%	3.36%	2.55%	3.42%	2.90%	4.23%	2.91%
Number of reads unmapped other	37468	51440	46565	39422	36479	27744	112748	41844	42163	52698	43717	42214	86240	64350	43365	74205	90747	62396	87478	81998	58860	89517	71478	63101	40572	13307	14715	111684	19314	25473	26750	25920	18800	126574	12503	17630	61852	58733	55099	72895	44433	51993	20890	36042	67439	39781	33675	64267	100001
of reads unmapped other	0.10%	0.15%	0.14%	0.13%	0.12%	0.21%	0.32%	0.13%	0.15%	0.27%	0.12%	0.14%	0.43%	0.23%	0.13%	0.28%	0.26%	0.18%	0.26%	0.19%	0.23%	0.28%	0.18%	0.27%	0.12%	0.04%	0.05%	0.39%	0.06%	0.09%	0.10%	0.08%	0.08%	0.40%	0.04%	0.06%	0.16%	0.17%	0.11%	0.25%	0.14%	0.20%	0.14%	0.13%	0.28%	0.14%	0.13%	0.24%	0.27%
[truncated: 59 more columns]
