# Supplementary material
Source: Research Square preprint supplement (doi:10.21203/rs.3.rs-9771771/v1)
Supplement: Supplementary file 2 [file e5e19c4fb7c5481a6cb28e38.xlsx]

## Sheet: Sheet1
Sample	Input.Read.Pairs	Both.Surviving	(%)	Forward.Only.Surviving	(%)	Reverse.Only.Surviving	(%)	Dropped	(%)
LA25_B1_FOLUST_Lf_0dpi_trimmomatic	40164575	35922428	89.44	1008671	2.51	1877334	4.67	1356142	3.38
LA25_B1_FOLUST_Lf_2dpi_trimmomatic	38496411	34285816	89.06	752156	1.95	2414508	6.27	1043931	2.71
LA25_B1_FOLUST_Lf_4dpi_trimmomatic	36711398	32187237	87.68	846603	2.31	2428598	6.62	1248960	3.4
LA25_B1_FOLUST_Rt_0dpi_trimmomatic	34008451	29963068	88.1	818420	2.41	2088420	6.14	1138543	3.35
LA25_B1_FOLUST_Rt_2dpi_trimmomatic	33608836	29503992	87.79	874463	2.6	2061456	6.13	1168925	3.48
LA25_B1_FOLUST_Rt_4dpi_trimmomatic	16145228	13268539	82.18	331822	2.06	1994350	12.35	550517	3.41
LA25_B1_Fomh16_Lf_0dpi_trimmomatic	42049507	35777176	85.08	882628	2.1	4006397	9.53	1383306	3.29
LA25_B1_Fomh16_Lf_2dpi_trimmomatic	36368709	32530363	89.45	913919	2.51	1705887	4.69	1218540	3.35
LA25_B1_Fomh16_Lf_4dpi_trimmomatic	31539146	27398682	86.87	783523	2.48	2289477	7.26	1067464	3.38
LA25_B1_Fomh16_Rt_0dpi_trimmomatic	24255118	19783807	81.57	464692	1.92	3218572	13.27	788047	3.25
LA25_B1_Fomh16_Rt_2dpi_trimmomatic	39704247	35467735	89.33	956331	2.41	2006790	5.05	1273391	3.21
LA25_B1_Fomh16_Rt_4dpi_trimmomatic	35129384	30864089	87.86	906263	2.58	2209771	6.29	1149261	3.27
LA25_B1_Mock_Lf_0dpi_trimmomatic	26460962	19953042	75.41	493657	1.87	5212902	19.7	801361	3.03
LA25_B1_Mock_Lf_2dpi_trimmomatic	33449980	28273572	84.52	662994	1.98	3494165	10.45	1019249	3.05
LA25_B1_Mock_Lf_4dpi_trimmomatic	37640335	32977791	87.61	890053	2.36	2533530	6.73	1238961	3.29
LA25_B1_Mock_Rt_0dpi_trimmomatic	30634610	26805909	87.5	613849	2	2367479	7.73	847373	2.77
LA25_B1_Mock_Rt_2dpi_trimmomatic	40820738	35420774	86.77	827161	2.03	3263890	8	1308913	3.21
LA25_B1_Mock_Rt_4dpi_trimmomatic	39559576	34915452	88.26	962074	2.43	2369657	5.99	1312393	3.32
LA25_B2_FOLUST_Lf_0dpi_trimmomatic	40387908	34158680	84.58	981861	2.43	3783345	9.37	1464022	3.62
LA25_B2_FOLUST_Lf_2dpi_trimmomatic	50086571	44062952	87.97	1277797	2.55	2998274	5.99	1747548	3.49
LA25_B2_FOLUST_Lf_4dpi_trimmomatic	31016061	25624175	82.62	775930	2.5	3367106	10.86	1248850	4.03
LA25_B2_FOLUST_Rt_0dpi_trimmomatic	37785810	31630802	83.71	1009552	2.67	3805390	10.07	1340066	3.55
LA25_B2_FOLUST_Rt_2dpi_trimmomatic	46424939	40027684	86.22	1016392	2.19	3759202	8.1	1621661	3.49
LA25_B2_FOLUST_Rt_4dpi_trimmomatic	27324865	22987075	84.13	665583	2.44	2655587	9.72	1016620	3.72
LA25_B2_Fomh16_Lf_0dpi_trimmomatic	37976149	33332787	87.77	1045237	2.75	2288195	6.03	1309930	3.45
LA25_B2_Fomh16_Lf_2dpi_trimmomatic	35014679	30309942	86.56	711166	2.03	2911714	8.32	1081857	3.09
LA25_B2_Fomh16_Lf_4dpi_trimmomatic	36461622	31909691	87.52	770494	2.11	2669340	7.32	1112097	3.05
LA25_B2_Fomh16_Rt_0dpi_trimmomatic	35085289	28789328	82.06	883537	2.52	4178108	11.91	1234316	3.52
LA25_B2_Fomh16_Rt_2dpi_trimmomatic	37140025	32411285	87.27	859633	2.31	2696930	7.26	1172177	3.16
LA25_B2_Fomh16_Rt_4dpi_trimmomatic	32360500	28574111	88.3	674358	2.08	2228857	6.89	883174	2.73
LA25_B2_Mock_Lf_0dpi_trimmomatic	29050170	25983096	89.44	774266	2.67	1320616	4.55	972192	3.35
LA25_B2_Mock_Lf_2dpi_trimmomatic	36599498	32577903	89.01	700375	1.91	2285076	6.24	1036144	2.83
LA25_B2_Mock_Lf_4dpi_trimmomatic	28757995	22527051	78.33	558207	1.94	4705922	16.36	966815	3.36
LA25_B2_Mock_Rt_0dpi_trimmomatic	38273033	31723352	82.89	1075659	2.81	4028110	10.52	1445912	3.78
LA25_B2_Mock_Rt_2dpi_trimmomatic	33453293	30415808	90.92	676296	2.02	1483651	4.43	877538	2.62
LA25_B2_Mock_Rt_4dpi_trimmomatic	35446004	30934485	87.27	712848	2.01	2756532	7.78	1042139	2.94
LA25_B3_FOLUST_Lf_0dpi_trimmomatic	42403684	37655170	88.8	1017706	2.4	2321209	5.47	1409599	3.32
LA25_B3_FOLUST_Lf_2dpi_trimmomatic	39055710	33928747	86.87	912791	2.34	2837437	7.27	1376735	3.53
LA25_B3_FOLUST_Lf_4dpi_trimmomatic	55008906	49099508	89.26	1184369	2.15	3214485	5.84	1510544	2.75
LA25_B3_FOLUST_Rt_0dpi_trimmomatic	32849279	29406830	89.52	734555	2.24	1755230	5.34	952664	2.9
LA25_B3_FOLUST_Rt_2dpi_trimmomatic	37015175	32729435	88.42	878204	2.37	2159973	5.84	1247563	3.37
LA25_B3_FOLUST_Rt_4dpi_trimmomatic	30725123	26122804	85.02	706379	2.3	2794724	9.1	1101216	3.58
LA25_B3_Fomh16_Lf_0dpi_trimmomatic	17091965	14963060	87.54	477642	2.79	1067013	6.24	584250	3.42
LA25_B3_Fomh16_Lf_2dpi_trimmomatic	31971795	28394146	88.81	858972	2.69	1688590	5.28	1030087	3.22
LA25_B3_Fomh16_Lf_4dpi_trimmomatic	32008823	24147724	75.44	734120	2.29	5858244	18.3	1268735	3.96
LA25_B3_Fomh16_Rt_0dpi_trimmomatic	33213412	29022115	87.38	897495	2.7	2234026	6.73	1059776	3.19
LA25_B3_Fomh16_Rt_2dpi_trimmomatic	29916012	26065155	87.13	775057	2.59	2049411	6.85	1026389	3.43
LA25_B3_Fomh16_Rt_4dpi_trimmomatic	35259569	27239189	77.25	802257	2.28	5916832	16.78	1301291	3.69
LA25_B3_Mock_Lf_0dpi_trimmomatic	43242319	37571814	86.89	1034892	2.39	3325894	7.69	1309719	3.03
LA25_B3_Mock_Lf_2dpi_trimmomatic	35930956	31579661	87.89	987084	2.75	2113706	5.88	1250505	3.48
LA25_B3_Mock_Lf_4dpi_trimmomatic	29174415	18453074	63.25	548835	1.88	8976808	30.77	1195698	4.1
LA25_B3_Mock_Rt_0dpi_trimmomatic	36047038	30916104	85.77	882560	2.45	3098133	8.59	1150241	3.19
LA25_B3_Mock_Rt_2dpi_trimmomatic	36038640	32233549	89.44	987630	2.74	1647504	4.57	1169957	3.25
LA25_B3_Mock_Rt_4dpi_trimmomatic	45598153	39262182	86.1	1125513	2.47	3748602	8.22	1461856	3.21
LA48_B1_FOLUST_Lf_0dpi_trimmomatic	38705915	34285958	88.58	1023900	2.65	2058337	5.32	1337720	3.46
LA48_B1_FOLUST_Lf_2dpi_trimmomatic	38869441	34617893	89.06	905832	2.33	2075367	5.34	1270349	3.27
LA48_B1_FOLUST_Lf_4dpi_trimmomatic	41052713	36677323	89.34	988206	2.41	2029463	4.94	1357721	3.31
LA48_B1_FOLUST_Rt_0dpi_trimmomatic	32223504	28535977	88.56	711122	2.21	2199421	6.83	776984	2.41
LA48_B1_FOLUST_Rt_2dpi_trimmomatic	34077047	30107975	88.35	874095	2.57	1944872	5.71	1150105	3.38
LA48_B1_FOLUST_Rt_4dpi_trimmomatic	35220132	31294231	88.85	862889	2.45	1860753	5.28	1202259	3.41
LA48_B1_Fomh16_Lf_0dpi_trimmomatic	38209960	31188845	81.62	774506	2.03	4963291	12.99	1283318	3.36
LA48_B1_Fomh16_Lf_2dpi_trimmomatic	31164054	26982104	86.58	726979	2.33	2398501	7.7	1056470	3.39
LA48_B1_Fomh16_Lf_4dpi_trimmomatic	38592205	33864120	87.75	902984	2.34	2516981	6.52	1308120	3.39
LA48_B1_Fomh16_Rt_0dpi_trimmomatic	39633960	34715584	87.59	858846	2.17	2834536	7.15	1224994	3.09
LA48_B1_Fomh16_Rt_2dpi_trimmomatic	43711821	38692740	88.52	1031188	2.36	2559365	5.86	1428528	3.27
LA48_B1_Fomh16_Rt_4dpi_trimmomatic	34440791	30318225	88.03	743495	2.16	2374865	6.9	1004206	2.92
LA48_B1_Mock_Lf_0dpi_trimmomatic	23795451	18964426	79.7	475712	2	3521503	14.8	833810	3.5
LA48_B1_Mock_Lf_2dpi_trimmomatic	35641809	30970184	86.89	779049	2.19	2701892	7.58	1190684	3.34
LA48_B1_Mock_Lf_4dpi_trimmomatic	30377597	27259652	89.74	592881	1.95	1874876	6.17	650188	2.14
LA48_B1_Mock_Rt_0dpi_trimmomatic	37674311	32641332	86.64	863868	2.29	2949521	7.83	1219590	3.24
LA48_B1_Mock_Rt_2dpi_trimmomatic	37191401	32604245	87.67	770842	2.07	2639338	7.1	1176976	3.16
LA48_B1_Mock_Rt_4dpi_trimmomatic	40711308	36017484	88.47	997753	2.45	2378949	5.84	1317122	3.24
LA48_B2_FOLUST_Lf_0dpi_trimmomatic	42723891	37869634	88.64	994477	2.33	2449305	5.73	1410475	3.3
LA48_B2_FOLUST_Lf_2dpi_trimmomatic	32605558	27042737	82.94	784179	2.41	3487727	10.7	1290915	3.96
LA48_B2_FOLUST_Lf_4dpi_trimmomatic	32117808	26816053	83.49	658234	2.05	3581336	11.15	1062185	3.31
LA48_B2_FOLUST_Rt_0dpi_trimmomatic	42679646	36752264	86.11	952090	2.23	3533739	8.28	1441553	3.38
LA48_B2_FOLUST_Rt_2dpi_trimmomatic	28319970	22344972	78.9	618965	2.19	4146222	14.64	1209811	4.27
LA48_B2_FOLUST_Rt_4dpi_trimmomatic	27527680	22029223	80.03	623441	2.26	3852572	14	1022444	3.71
LA48_B2_Fomh16_Lf_0dpi_trimmomatic	40795168	34771479	85.23	1073609	2.63	3542633	8.68	1407447	3.45
LA48_B2_Fomh16_Lf_2dpi_trimmomatic	32539283	28581894	87.84	702983	2.16	2240137	6.88	1014269	3.12
LA48_B2_Fomh16_Lf_4dpi_trimmomatic	29522396	25160595	85.23	668537	2.26	2759177	9.35	934087	3.16
LA48_B2_Fomh16_Rt_0dpi_trimmomatic	37753975	29604127	78.41	848645	2.25	5818067	15.41	1483136	3.93
LA48_B2_Fomh16_Rt_2dpi_trimmomatic	35245810	31088441	88.2	676298	1.92	2460847	6.98	1020224	2.89
LA48_B2_Fomh16_Rt_4dpi_trimmomatic	37716988	33464211	88.72	761963	2.02	2490033	6.6	1000781	2.65
LA48_B2_Mock_Lf_0dpi_trimmomatic	43218110	36747424	85.03	1113276	2.58	3798303	8.79	1559107	3.61
LA48_B2_Mock_Lf_2dpi_trimmomatic	37611637	33108244	88.03	794747	2.11	2578036	6.85	1130610	3.01
LA48_B2_Mock_Lf_4dpi_trimmomatic	39432989	35209372	89.29	838564	2.13	2257323	5.72	1127730	2.86
LA48_B2_Mock_Rt_0dpi_trimmomatic	41598810	35364500	85.01	1052587	2.53	3754872	9.03	1426851	3.43
LA48_B2_Mock_Rt_2dpi_trimmomatic	36589550	32836314	89.74	652521	1.78	2206225	6.03	894490	2.44
LA48_B2_Mock_Rt_4dpi_trimmomatic	28797642	25399003	88.2	568906	1.98	1963157	6.82	866576	3.01
LA48_B3_FOLUST_Lf_0dpi_trimmomatic	15299784	13991568	91.45	328304	2.15	708470	4.63	271442	1.77
LA48_B3_FOLUST_Lf_2dpi_trimmomatic	41001388	36145129	88.16	983200	2.4	2482671	6.06	1390388	3.39
LA48_B3_FOLUST_Lf_4dpi_trimmomatic	34617724	29474912	85.14	804273	2.32	3074263	8.88	1264276	3.65
LA48_B3_FOLUST_Rt_0dpi_trimmomatic	39075307	34727919	88.87	963199	2.46	2106006	5.39	1278183	3.27
LA48_B3_FOLUST_Rt_2dpi_trimmomatic	29995806	25907256	86.37	648663	2.16	2406474	8.02	1033413	3.45
LA48_B3_FOLUST_Rt_4dpi_trimmomatic	37919616	32290535	85.16	930463	2.45	3393449	8.95	1305169	3.44
LA48_B3_Fomh16_Lf_0dpi_trimmomatic	26857370	23224115	86.47	765066	2.85	1920951	7.15	947238	3.53
LA48_B3_Fomh16_Lf_2dpi_trimmomatic	37633516	33900515	90.08	952007	2.53	1608643	4.27	1172351	3.12
LA48_B3_Fomh16_Lf_4dpi_trimmomatic	40573309	25185063	62.07	767455	1.89	12911455	31.82	1709336	4.21
LA48_B3_Fomh16_Rt_0dpi_trimmomatic	25955356	22296154	85.9	786649	3.03	1944172	7.49	928381	3.58
LA48_B3_Fomh16_Rt_2dpi_trimmomatic	34493999	30754273	89.16	878177	2.55	1747164	5.07	1114385	3.23
LA48_B3_Fomh16_Rt_4dpi_trimmomatic	36645927	15988539	43.63	520413	1.42	18270970	49.86	1866005	5.09
LA48_B3_Mock_Lf_0dpi_trimmomatic	32507744	20896223	64.28	635214	1.95	9691070	29.81	1285237	3.95
LA48_B3_Mock_Lf_2dpi_trimmomatic	25670762	22299448	86.87	681554	2.65	1813695	7.07	876065	3.41
LA48_B3_Mock_Lf_4dpi_trimmomatic	31223550	25769967	82.53	740404	2.37	3580009	11.47	1133170	3.63
LA48_B3_Mock_Rt_0dpi_trimmomatic	32532463	28645845	88.05	845522	2.6	1979450	6.08	1061646	3.26
LA48_B3_Mock_Rt_2dpi_trimmomatic	31862149	28325474	88.9	822118	2.58	1697345	5.33	1017212	3.19
LA48_B3_Mock_Rt_4dpi_trimmomatic	34373764	29506273	85.84	950093	2.76	2699922	7.85	1217476	3.54
Maxium	55008906	49099508	91.45	1277797	3.03	18270970	49.86	1866005	5.09
Minium	15299784	13268539	43.63	328304	1.42	708470	4.27	271442	1.77
Avrage	3.51322e+07	3.00493e+07	85.3865	814588	2.31639	3.10288e+06	8.98194	1.16536e+06	3.31509
